# Supplementary material for: Polyclonal Antibody Generation against PvTRAg for the Development of a Diagnostic Assay for Plasmodium vivax
Source: MDPI journal article supplement (doi:10.3390/diagnostics13050835), 2023-02-22
Supplement: s1 [file s1]

# Polyclonal Antibody Generation against PvTRAg for the Development of a Diagnostic Assay for *Plasmodium vivax*

Shalini Aggarwal <sup>1,2</sup>, Selvamano Selvaraj <sup>3</sup>, Jayaprakash Nattamai Subramanian <sup>3</sup>,  
Mookambeswaran Arunachalam Vijayalakshmi <sup>3</sup>, Swati Patankar <sup>1</sup> and Sanjeeva Srivastava <sup>1,\*</sup>

<sup>1</sup> Department of Biosciences and Bioengineering, Indian Institute of Technology Bombay, Mumbai 400076, India

<sup>2</sup> Department of Molecular Genetics, Weizmann Institute of Science, Rehovot 7610010, Israel

<sup>3</sup> Centre for Bio-Separation Technology, Vellore Institute of Technology, Vellore 632014, India

\* Correspondence: sanjeeva@iitb.ac.in; Tel.: +91-(22)-2576-7779

## Supplementary data

A. The ELISA was performed with preimmunized Rabbit serum and immunized rabbit serum (after booster dose) and the absorbance data found was

| SAMPLE                     | Primary Antibody<br>Dilution (1:) | OD @450nm     |               |
|----------------------------|-----------------------------------|---------------|---------------|
|                            |                                   | <u>O.D. 1</u> | <u>O.D. 2</u> |
| Blank                      | 0                                 | 0.084         | 0.064         |
| Pre-Immunized Rabbit serum | 2000                              | 0.118         | 0.109         |
| Immunized Rabbit serum     | 2000                              | 3.326         | 3.301         |

B. Inclusion and exclusion criteria for clinical samples used in the study are –

### Inclusion criteria (Healthy Controls):

1. Participants of either sex, between 18-65 years of age.
2. No recent history of febrile illness or other disease conditions.
3. Those willing to provide written informed consent and comply with protocol requirements

### Inclusion criteria (Malaria):

1. Participants of either sex, between 18-65 years of age.
2. Patients with *P. vivax* or *P. falciparum* infection confirmed with microscopic examination and/or RDT
3. Those willing to provide written informed consent and comply with protocol requirements

### Exclusion criteria (Malaria and Healthy individuals):

- 1 People with a history of significant systemic diseases like autoimmune disorders, chronic liver disease, chronic kidney disease, neuro-psychiatric illness, or any other illness likely to affect blood biochemistry/ cytology, as judged by history and physical examination.
2. Co-infection with dengue, chikungunya, viral hepatitis, typhoid or any other commonly prevalent infectious disease

3. Subjects unwilling to consent to the study.

Supplementary Figure S1:

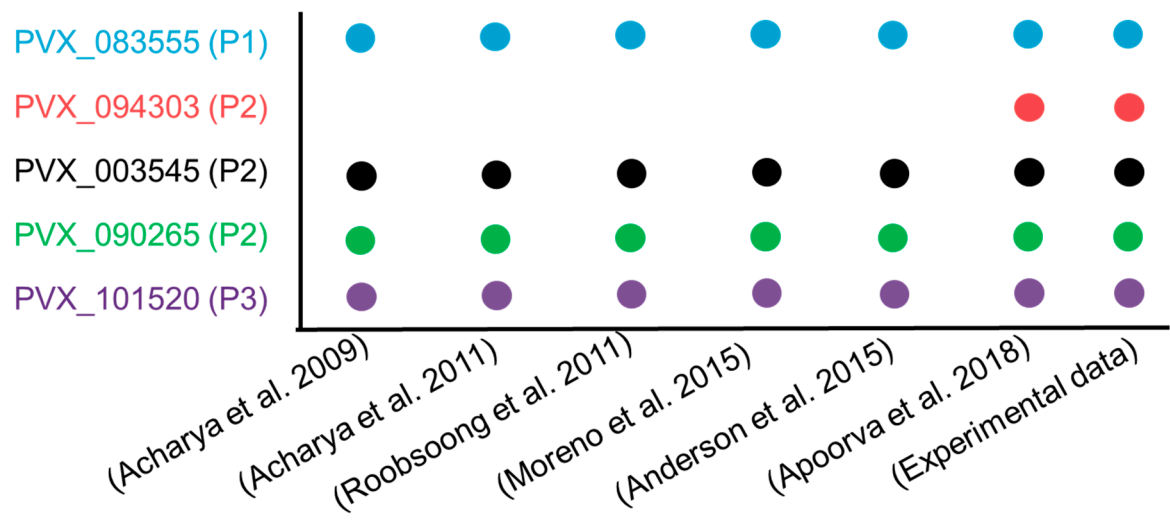

Figure S1: Diagram represents parasite proteins reported repeatedly in all studies on clinical samples.
